# Supplementary material for: Improving management of type 2 diabetes in South Asian patients: a systematic review of intervention studies
Source: PubMed Central journal article supplement — BMJ Open. 2016 Apr 20;6(4):e008986. doi: 10.1136/bmjopen-2015-008986 (PMC4838706; doi:10.1136/bmjopen-2015-008986), 2016-04-20
Supplement: bmjopen-2015-008986supp.pdf [file bmjopen-2015-008986supp.pdf]

MEDLINE, EMBASE, (OVID): [India/ OR Pakistan/ OR Bangladesh/ OR South Asian/ OR East Indian] AND [Diabetes Mellitus, Type 2/] AND [Management.mp. OR Manage\$.mp. OR Intervention\$.mp.];

CINAHL (EBSCO): [India OR Pakistan OR Bangladesh] AND [Diabetes] AND [Management TXT OR Manage\$ TXT OR Intervention\$ TXT]
